1 Can model-free reinforcement learning operate over  
2 information stored in working-memory?

3 Carolina Feher da Silva\*<sup>1</sup>, Yuan-Wei Yao<sup>2</sup>, and Todd A. Hare<sup>1,3</sup>

4 <sup>1</sup>Zurich Center for Neuroeconomics, Department of Economics, University of  
5 Zurich

6 <sup>2</sup>State Key Laboratory of Cognitive Neuroscience and Learning and  
7 IDG/McGovern Institute for Brain Research, Beijing Normal University

8 <sup>3</sup>Zurich Center for Neuroscience, University of Zurich and ETH

9 **Abstract**

10 Model-free learning creates stimulus-response associations. But what constitutes a stimu-  
11 lus? Are there limits to types of stimuli a model-free or habitual system can operate over? Most  
12 experiments on reward learning in humans and animals have used discrete sensory stimuli, but  
13 there is no algorithmic reason that model-free learning should be restricted to external stimuli,  
14 and recent theories have suggested that model-free processes may operate over highly abstract  
15 concepts and goals. Our study aimed to determine whether model-free learning processes can  
16 operate over environmental states defined by information held in working memory. Specifi-  
17 cally, we tested whether or not humans can learn explicit temporal patterns of individually  
18 uninformative cues in a model-free manner. We compared the data from human participants  
19 in a reward learning paradigm using (1) a simultaneous symbol presentation condition or (2)  
20 a sequential symbol presentation condition, wherein the same visual stimuli were presented si-  
21 multaneously or as a temporal sequence that required working memory. We found a significant  
22 effect of reward on human behavior in the sequential presentation condition, indicating that  
23 model-free learning can operate on information stored in working memory. Further analyses,  
24 however, revealed that the behavior of the participants contradicts the basic assumptions of  
25 our hypotheses, and it is possible that the observed effect of reward was generated by model-  
26 based rather than model-free learning. Thus it is not possible to draw any conclusions from

---

\*Corresponding author

27 out study regarding model-free learning of temporal sequences held in working memory. We  
28 conclude instead that careful thought should be given about how to best explain two-stage  
29 tasks to participants.

## 30 1 Introduction

31 Reinforcement learning theory and the computational algorithms associated with it have been ex-  
32 tremely influential in the behavioral, biological, and computer sciences. Reinforcement learning  
33 theory describes how an agent learns by interacting with its environment [1]. In a typical reinforce-  
34 ment learning paradigm, the agent selects an action and the environment responds by presenting  
35 rewards and taking the agent to the next situation, or state. A reinforcement learning algorithm  
36 determines how the agent changes its action selection strategy as a result of experience, with the  
37 goal of maximizing future rewards. Depending on how algorithms accomplish this goal, they are  
38 classified as model-free or model-based [1]. Model-based algorithms acquire beliefs about how the  
39 environment generates outcomes in response to their actions and select actions according to their  
40 predicted consequences. By contrast, model-free algorithms generate a propensity to perform, in  
41 each state of the world, actions that were more rewarding in previous visits to that environmen-  
42 tal state. Model-free reinforcement learning algorithms are of considerable interest to behavioral  
43 and biological scientists, in part because they offer a compelling account of the phasic activity  
44 of dopamine neurons, but also more generally can explain many observed patterns of behavior in  
45 human and non-human animals [2, 3, 4, 5, 6, 7].

46 A key concept in reinforcement learning theory is the environmental state. Typically, empiri-  
47 cal tests of reinforcement learning algorithms use discrete sensory stimuli to define environmental  
48 states. However, there is no theoretical or algorithmic constraint to define the states of the en-  
49 vironment exclusively by sensory stimuli. State definitions may also include the agent’s internal  
50 stimuli, such as its memory of past events, thirst or hunger level, or even subjective characteristics  
51 such as happiness or sadness [1]. Thus, model-free reinforcement learning might operate over a  
52 wide variety of both external and internal factors.

53 Indeed, recent work suggests that model-free learning algorithms can support a large set of  
54 cognitive processes and behaviors beyond the formation of habitual response associations with  
55 discrete sensory stimuli [8, 9, 10]. For instance, it has been proposed that the model-free system  
56 can perform the action of selecting a goal for goal-directed planning [11] or conversely that a model-  
57 based decision can trigger a habitual action sequence [12, 13, 14, 15]. Model-free algorithms have  
58 also been suggested to gate working memory [16]. However, many of these important theoretical

59 proposals about model-free algorithms have not been directly tested empirically.

60 Here, we determine the ability of model-free reinforcement learning algorithms to operate over  
61 states defined by information held in working memory, an internal state. Specifically, we use  
62 an experimental paradigm and computational modeling framework designed to dissociate model-  
63 free from model-based influences on behavior [17] to test if temporally separated sequences of  
64 individually uninformative cues can drive model-free learning and behavior. If an agent can store  
65 the elements of a temporal sequence in its memory to form a unique and predictive cue and use the  
66 memorized information as the state definition, then, theoretically, it can use model-free algorithms  
67 to learn the associations between a specific sequence of *individually uninformative cues* and action  
68 outcomes [18].

69 Our approach has several important facets. First, we use an experimental paradigm that  
70 allows us to determine not only if our participants learn from information in working memory,  
71 but also whether that learning is supported by model-based or model-free algorithms. Second, the  
72 cues in our temporal sequences are individually uninformative; in other words, any single cue in  
73 isolation provides no information about which response is correct. It is well-known that model-  
74 free algorithms can shift response associations to the earliest occurring predictor of the correct  
75 response in a temporal sequence of informative cues and can integrate predictive information across  
76 individual cues. Neither of these mechanisms is possible in our paradigm because the individual  
77 cues themselves contain no information about the previous or subsequent cues or which response  
78 is best.

79 Temporal pattern learning is a fundamental and early developing human cognitive ability. It  
80 allows people to form predictions about what will happen from what has happened and select  
81 their actions accordingly. Humans can learn patterns both explicitly and implicitly in the absence  
82 of specific instructions or conscious awareness [19]. Moreover, they can do so as early as two  
83 months of age [20]. In fact, people identify patterns even when, in reality, no pattern exists [21].  
84 These empirical results together with the theoretical potential for model-free learning to operate  
85 over internal stimuli suggest that temporal pattern learning could be supported by model-free  
86 processes. However, to date, studies of reinforcement learning and decision making have focused  
87 primarily on tasks in which the relevant stimuli are presented simultaneously just prior to or at  
88 the time of decision-making, or on implicit motor sequence learning, wherein participants learn  
89 a sequence of movements automatically, without full awareness (for instance, 22, 23, 24, 25, 26).  
90 Thus, the degree to which model-free processes do in fact operate over temporal sequences or any  
91 other information stored in working memory has not yet been directly tested and compared with  
92 model-free learning from traditionally employed external, static environmental cues.



Figure 1: **Timelines of events in a trial.** The two symbols that represent the initial state are presented simultaneously in the simultaneous condition (left) and separately as a temporal sequence in the sequential condition (right). In this example, AB is the initial state. The simultaneous condition participant goes to the pink final state and receives a reward (signaled by the green \$ symbol). The sequential condition participant goes to the blue final state and does not receive a reward (signaled by the black X symbol).

93 Here, we directly test whether model-free processes can access and learn from information  
94 stored in working memory. We adapted a decision-making paradigm originally developed by Daw  
95 et al. [17] that can behaviorally dissociate the influence of model-free and model-based learning  
96 on choice. The task was performed by two groups of human participants either in a simultaneous  
97 condition (i.e. static and external), wherein visual stimuli were presented simultaneously, or in a  
98 sequential condition, wherein the same visual stimuli were presented as a temporal sequence that  
99 required working memory processing.

## 100 2 Results

### 101 2.1 Determining model-free and model-based influences on choice be- 102 havior

103 Forty-one young adult human participants completed a behavioral task adapted from Daw et al.  
104 [17]. In our task, participants began each trial in a randomly selected initial state represented by  
105 one of four possible sequences of two symbols: AA, AB, BA, or BB (Figure 1). At this initial state,  
106 participants chose one of two possible actions: going left or going right. They were then taken to  
107 one of two possible final states, the blue state or the pink state. If they had gone left, they were  
108 taken with 0.8 probability to the final state given by the rule AA → blue, AB → pink, BA → pink,



Figure 2: **Common state transitions in the behavioral task's model.** These graphics highlight the uninformative nature of each single element (i.e. A or B symbols) in the simultaneous or sequential cues. Knowledge of only the first or final element of the combined cue provides no indication of how likely the right and left responses are to lead to a specific state.

109 BB → blue or with 0.2 probability to the other final state. If they had gone right, they were taken  
110 with 0.8 probability to the final state *not* given by the previous rule or with 0.2 probability to the  
111 other final state. The common (most probable) transitions between the initial and final states are  
112 shown in Figure 2. To predict the final state accurately, participants had to know both elements  
113 of the sequence. If they knew only one, the final state might have been either blue or pink with 0.5  
114 probability and they would not be able to perform above chance. This feature is key and separates  
115 our work from others in which each element of a sequence is predictive on its own.

116 One of the final states delivered a monetary reward with 0.7 probability and the other with  
117 0.3 probability. The optimal strategy was to always select the action that led with 0.8 probability  
118 to the final state with 0.7 reward probability. Initially, participants were instructed to learn the  
119 common transitions between the initial and final states in the absence of rewards. They were told  
120 that each final state might be rewarded with different probabilities, but not what the probabilities  
121 were nor that they were fixed. The task comprised 250 trials and participants received the total  
122 reward they obtained at the end.

123 Twenty-one participants were randomly allocated to a simultaneous condition and twenty to a  
124 sequential condition (Figure 1). In the simultaneous condition, both symbols that represented the  
125 initial state were displayed simultaneously on the screen. In the sequential condition, each symbol  
126 was displayed consecutively by itself, as a temporal sequence. The specific objective of this study

127 was to determine if participants in the sequential condition could use states represented in working  
128 memory to learn the task in a model-free way or if their learning was necessarily model-based. The  
129 simultaneous condition is already known to support model-free learning as well as model-based  
130 learning [17, 27, 28, 29, 30]. We thus sought to determine the difference between the standard  
131 simultaneous and working-memory dependent sequential conditions.

132 The two-stage task we used can differentiate between model-free and model-based learning  
133 because algorithms that implement them make different predictions about how a reward received  
134 in a trial impacts a participant's choices in subsequent trials. The SARSA ( $\lambda = 1$ ) model-free  
135 algorithm learns this task by strengthening or weakening associations between initial states and  
136 initial-state actions depending on whether the action is followed by a reward or not [1]. Therefore,  
137 it simply predicts that an initial-state action that resulted in a reward is more likely to be repeated  
138 in the next trial with the same initial state [17]. On the other hand, the model-based algorithm  
139 considered in this study uses an internal model of the task's structure to determine the initial-  
140 state choice that will most likely result in a reward [17]. To this end, it considers which final state,  
141 pink or blue, was most frequently rewarded in recent trials and selects the initial-state action, left  
142 or right, that will most likely lead there. Therefore, the model-free algorithm predicts that the  
143 participant will choose the mostly frequently rewarded *action* in past trials with the same initial  
144 state, while the model-based algorithm predicts that the participant will choose the action with the  
145 highest probability of leading to the mostly frequently rewarded *final state* in past trials, regardless  
146 of their initial states.

147 The model-free and model-based algorithms thus generate different predictions about the *stay*  
148 *probability*, which is the probability that in two consecutive trials the participant will stay with  
149 their first choice and take the same initial-state action in the second trial. For instance, if the  
150 participant chose left in two consecutive trials, this was considered a stay. The model-free and  
151 model-based predictions are different if the letters presented in one trial are the same or different  
152 than the letters presented in the other trial, so we ran four separate analyses on the data from each  
153 condition, dividing consecutive trial pairs into four subsets: "same letters" if both letters presented  
154 in the first trial are the same as the letters presented in the second trial (for example, AB for the  
155 first trial and AB again for the second trial), "same first letter" if the first letters presented in each  
156 trial are the same but the second letters are different (for example, AB and AA), "same second  
157 letter" if the second letters are the same but the first letters are different (for example, AB and  
158 BB), and "different letters" if both the first letters and the second letters are different (for example,  
159 AB and BA).

160 In all cases, we analyzed the data using Bayesian hierarchical logistic regression analyses. In



**Figure 3: Stay probabilities of simulated agents and human participants for consecutive trial pairs in the “same letters” subset.** A- Stay probabilities of purely model-free simulated agents. B- Stay probabilities of purely model-based simulated agents. C- Stay probabilities of human participants in the simultaneous condition. D- Stay probabilities of human participants in the sequential condition. The error bars correspond to the 95% credible interval.



Figure 4: **Stay probabilities of simulated agents and human participants for consecutive trial pairs in the "same first letter" subset.** A- Stay probabilities of purely model-free simulated agents. B- Stay probabilities of purely model-based simulated agents. C- Stay probabilities of human participants in the simultaneous condition. D- Stay probabilities of human participants in the sequential condition. The error bars correspond to the 95% credible interval.



**Figure 5: Stay probabilities of simulated agents and human participants for consecutive trial pairs in the “same second letter” subset.** A- Stay probabilities of purely model-free simulated agents. B- Stay probabilities of purely model-based simulated agents. C- Stay probabilities of human participants in the simultaneous condition. D- Stay probabilities of human participants in the sequential condition. The error bars correspond to the 95% credible interval.



Figure 6: **Stay probabilities of simulated agents and human participants for consecutive trial pairs in the “same letters” subset.** A- Stay probabilities of purely model-free simulated agents. B- Stay probabilities of purely model-based simulated agents. C- Stay probabilities of human participants in the simultaneous condition. D- Stay probabilities of human participants in the sequential condition. The error bars correspond to the 95% credible interval.



Figure 7: **Logistic regression coefficients of simulated agents and human participants for consecutive trial pairs in the “same letters” subset.** A- Logistic regression coefficients of purely model-free and purely model-based simulated agents. B- Difference between the coefficients of purely model-based and purely model-free simulated agents. C- Logistic regression coefficients of human participants in the simultaneous and sequential conditions. D- Difference between the coefficients of human participants in the simultaneous and sequential conditions. The error bars correspond to the 95% credible interval.



**Figure 8: Logistic regression coefficients of simulated agents and human participants for consecutive trial pairs in the “same first letter” subset.** A- Logistic regression coefficients of purely model-free and purely model-based simulated agents. B- Difference between the coefficients of purely model-based and purely model-free simulated agents. C- Logistic regression coefficients of human participants in the simultaneous and sequential conditions. D- Difference between the coefficients of human participants in the simultaneous and sequential conditions. The error bars correspond to the 95% credible interval.



Figure 9: **Logistic regression coefficients of simulated agents and human participants for consecutive trial pairs in the “same second letter” subset.** A- Logistic regression coefficients of purely model-free and purely model-based simulated agents. B- Difference between the coefficients of purely model-based and purely model-free simulated agents. C- Logistic regression coefficients of human participants in the simultaneous and sequential conditions. D- Difference between the coefficients of human participants in the simultaneous and sequential conditions. The error bars correspond to the 95% credible interval.



Figure 10: **Logistic regression coefficients of simulated agents and human participants for consecutive trial pairs in the “different letters” subset.** A- Logistic regression coefficients of purely model-free and purely model-based simulated agents. B- Difference between the coefficients of purely model-based and purely model-free simulated agents. C- Logistic regression coefficients of human participants in the simultaneous and sequential conditions. D- Difference between the coefficients of human participants in the simultaneous and sequential conditions. The error bars correspond to the 95% credible interval.

161 addition to examining the stay choice probabilities, we directly examined the logistic regression  
162 coefficients for each condition and trial pair subset. Because in our task the mean reward probability  
163 associated with one final state is higher than the mean reward probability associated with the  
164 other final state, we did not use the logistic regression model proposed by Daw et al. [17]—as  
165 several studies demonstrate, if the reward probabilities are not the same, a reward by transition  
166 interaction does not uniquely characterizes model-based agents, but also appears in purely model-  
167 free results [31, 32, 33, 34]. We thus used instead an extended logistic regression model we had  
168 previously proposed that corrects for different reward probabilities by adding two control predictors:  
169 a binary variable that indicates whether or not the chosen initial-state action in the first trial  
170 leads commonly to the final state with the highest reward probability, and a binary variable that  
171 indicates whether or not the agent visited in the first trial the final state with the highest reward  
172 probability [34]. For comparison with the behavior of human participants, we fitted model-free  
173 and model-based algorithms to the experimental data, used the obtained parameter estimates to  
174 simulate purely model-free and purely model-based agents performing our task, and analyzed the  
175 resulting data using the same logistic regression procedure. The stay probabilities obtained for  
176 both simulated agents and human participants are shown in Figures 3, 4, 5, and 6, and the logistic  
177 regression coefficients obtained for both simulated agents and human participants are shown in  
178 Figures 7, 8, 9, and 10.

179 As can be seen in Figure 7A, if the letters are the same, for example AB for both trials, the  
180 model-free prediction is that the stay probability will increase if the first trial was rewarded and  
181 decrease if it was not; i.e., model-free learning creates a positive reward effect. The model-based  
182 prediction, on the other hand, is that the stay probability will increase if either the first trial was  
183 rewarded and the transition was common or the first trial was unrewarded and the transition was  
184 rare, and decrease otherwise; i.e. model-based learning creates a positive reward by transition  
185 interaction [17]. If the consecutive trials have different initial-state letters, the predictions will  
186 be different depending on the condition (simultaneous or sequential) and the assumed hypothesis  
187 regarding model-free learning of temporal sequences. In the simultaneous condition, the model-  
188 free prediction is that the stay probability will not change, because learning does not generalize  
189 among different initial states (Figures 8A, 9A, and 10A). In the sequential condition, if we assume  
190 that model-free learning *can* learn from temporal sequences, then the prediction is that the stay  
191 probability will also not change (Figures 8A, 9A, and 10A). If, however, we assume that model-free  
192 learning *cannot* learn from temporal sequences, then the model-free system may associate the first  
193 letter or the second letter to previously received rewards. Assuming, for example, that the second  
194 letter is associated with rewards, if the two consecutive trials have the same second letter, the

195 stay probability should increase if the previous trial was rewarded and decrease if the previous  
196 trial was unrewarded; if the two consecutive trials have different second letters, however, the stay  
197 probability should not change. The simulated results for the latter hypothesis are not shown; in  
198 the Figures above, we assumed that model-free learning *can* learn from temporal sequences. For  
199 model-based learning, the prediction is that the reward by transition interaction will be positive  
200 if both letters are the same or both letters are different for the two trials (for example, the first  
201 trial's letters are AB and the second trial's letters are either AB or BA—see Figures 7A and 10A),  
202 because in this case the common and rare transitions are the same for both trials. If one letter  
203 is the same but the other letter is different (for example, the first trial's letters are AB and the  
204 second trial's letters are AA or BB—see Figures 8A and 9A), the model-based prediction is that  
205 the reward by transition interaction will be negative, because in this case the common and rare  
206 transitions are switched between the trials, so if the left action commonly leads to pink state in  
207 the first trial, for instance, it commonly leads to the blue state in the second trial.

208 For our sample of the human participants and trial pairs in the “same letters” subset, behavior  
209 was influenced by both reward and reward by transition interaction regardless of whether the states  
210 were defined by external sensory cues or internal working-memory representations (Figures 7C). We  
211 thus found no evidence that sequentially presented, working-memory-dependent state cues shift the  
212 balance of model-based and model-free effects on choice behavior compared to traditional, static,  
213 external cues. However, the results obtained for other trial pair subsets show unpredicted effects,  
214 namely: (1) there is a negative effect of reward for the sequential condition in the “same second  
215 letter” subset (Figure 9C); the estimated value of this coefficient is  $-0.20$  (95% CI  $[-0.39, -0.01]$ );  
216 and (2) there is a positive effect of reward for the simultaneous condition in the “different letters”  
217 subset (Figure 10C); the estimated value of this coefficient is  $0.23$  (95% CI  $[0.02, 0.43]$ ). Because of  
218 these unexpected results, we decided to replicate our experiment using a task that had geometric  
219 figures rather than letters to identify the different initial states (see Appendix on page 29). 32  
220 human participants performed that task in both the simultaneous and sequential conditions. We  
221 again observed in the replicated data a negative reward effect for the sequential condition in the  
222 “same first letter” and “same second letter” subsets, as well as a positive reward effect for both the  
223 sequential and the simultaneous condition in the “different letters” subset.

### 224 3 Discussion

225 In this study, we empirically tested the hypothesis that human participants can develop model-free  
226 associations between temporal sequences of stimuli stored in working memory and a motor response.

227 To that end, we developed a behavioral task based on a previous decision-making paradigm that  
228 can determine the model-free and model-based influences on choice [17]. The participants in  
229 the simultaneous condition performed this task with the two visual symbols presented together  
230 simultaneously and those in the sequential condition performed it with the same two visual symbols  
231 presented as a temporal sequence that had to be held in working memory. A key element of our  
232 experimental paradigm is that the individual symbols within each temporal sequence convey no  
233 information about the best response in isolation. This fact rules out the possibility that the  
234 sequential condition’s model-free effect is due to an association between a single symbol in the  
235 sequence and a response rather than one between the entire sequence and a response. Each sequence  
236 element is completely uninformative by itself: it cannot predict reward delivery above chance.  
237 Therefore, the task cannot be learned by simple stimulus-response associations with individual  
238 symbols in the temporal sequence.

239 At first glance, our results support the hypothesis that model-free learning can operate on  
240 stimuli stored in working memory. Two findings, however, cannot be explained by the assumed  
241 model of hybrid reinforcement learning, adapted to the two-stage task by Daw et al. [17]. Since  
242 model-free learning is assumed to be unable to generalize between distinct states (see Doll et al.  
243 35, Kool et al. 36 for example studies that critically depend on this assumption) and model-based  
244 learning is assumed to generate only a reward by transition interaction, there should not be a  
245 reward effect for consecutive trials with different initial-state symbols. Yet, we observed a positive  
246 reward effect for trial pairs in the “different letters” subset both in the data presented here and in  
247 the follow-up replication study using a different initial-state representation. A possible explanation  
248 for this finding is that, after all, model-free learning is able to generalize between different state  
249 representations. It is possible that participants reduced the two-letter sequence to an abstract  
250 representation such as “the two letters were the same” (either AA or BB) or “the two letters were  
251 different” (either AB or BA). This abstraction is sufficient to determine the common and rare  
252 transitions, and we know from direct reports that at least some participants used it to memorize  
253 the transition rules. If model-free learning can operate on stimuli stored in working memory,  
254 it is also conceivable it can also operate on abstract representations stored in working memory.  
255 However, the use of abstract state representations cannot explain our second unpredicted finding:  
256 a negative effect of reward observed for the sequential condition in the “same second letter” subset  
257 and, in the replication study, also in the “same first letter” subset. Under the assumed model of  
258 hybrid learning, the reward effect can never be negative. The TD( $\lambda = 1$ ) algorithm used here to  
259 model model-free learning in the brain foresees no circumstances under which rewarding one action  
260 would *decrease* the probability of choosing that action again in the future.

261 The unpredicted reward effects we observed in some analyses raise a question about the pre-  
262 dicted reward effect observed in other analyses: Does a reward effect truly indicate model-free  
263 learning in our data set? Is it not possible that at least some of these effects are generated by  
264 model-based learning instead? It is commonly assumed that model-based learning does not gen-  
265 erate a reward effect, because it is assumed that participants make model-based decisions using  
266 a specific model of the task structure. It is possible, however, that the model they are using is  
267 different from the assumed one and can generate positive as well as negative reward effects. For  
268 example, a participant might think that their initial-state choices influence the reward probabilit-  
269 ity, even if they are told this is not the case—they might have misunderstood or forgotten the  
270 instructions or thought the instructions were misleading.

271 Given that at least some of the observed reward effects may be generated by model-based rather  
272 than model-free learning, we cannot conclude that our data presents evidence for or against the  
273 hypothesis that model-free learning can operate over information held in working memory. In order  
274 to study this or other hypotheses involving model-free learning, it is crucial that participants are  
275 using a model of the task structure for model-based learning that does not generate reward effects.  
276 Future research may thus concentrate on developing more detailed and precise instructions, as well  
277 as tutorials and tests, to make sure that participants really understood the task and what they  
278 have to do. It is also essential that the data are checked for violations of the assumed model using  
279 multiple analyses.

## 280 4 Methods

### 281 4.1 Participants

282 Forty-one healthy young adults participated in the experiment, 21 (13 female) randomly assigned  
283 by a random number generator to the simultaneous condition and 20 (13 female) to the sequential  
284 condition. The inclusion criterion was speaking English and no participants were excluded from  
285 the analysis. The sample size was chosen by the precision for research planning method [37, 38], by  
286 comparing the estimated differences between participant groups in the logistic regression analysis  
287 with those between model-free and model-based simulated agents.

288 The experiment was conducted in accordance with the Zurich Cantonal Ethics Commission’s  
289 norms for conducting research with human participants, and all participants gave written informed  
290 consent.

## 291 4.2 Task

292 The task's state transition model defines four possible initial states, which were randomly selected  
293 with uniform distribution in each trial and represented by four different stimuli, each composed of  
294 two symbols: AA, AB, BA, or BB. At the initial state, two actions were available to the participant:  
295 pressing the left or the right arrow keys. By pressing one of the keys, the participant was taken  
296 to a final state, which might be either the blue state or the pink state. If the left arrow key was  
297 pressed, the participant was taken to the final state given by the rule  $AA \rightarrow \text{blue}$ ,  $AB \rightarrow \text{pink}$ ,  
298  $BA \rightarrow \text{pink}$ ,  $BB \rightarrow \text{blue}$  with 0.8 probability or to the other state with 0.2 probability; if the right  
299 arrow key was pressed, the participant was taken to the final state not given by the previous rule  
300 with 0.8 probability or to the other state with 0.2 probability. There was no choice of action at the  
301 final state, but participants were required to make a button press to potentially earn the reward.  
302 Each final state was rewarded according to an associated probability, which was 0.7 for one state  
303 and 0.3 for the other. The highest reward probability was associated with the blue state for half  
304 of the participants and to the pink state for the other half. Participants were told that each final  
305 state might be rewarded with different probabilities, but not what the probabilities were nor that  
306 they were fixed.

307 In contrast with our task design, in which the final states' reward probabilities were fixed, in  
308 the original task design proposed by Daw et al. [17] the reward probabilities slowly drifted over  
309 time, because those authors were interested in the trade-off between model-based and model-free  
310 mechanisms, which is assumed to happen on the basis of their relative uncertainties. In this study  
311 we were interested instead in testing if model-free learning of temporal patterns is possible and  
312 keeping the task environment stable helps making the model-free associations stronger and more  
313 likely to influence choice [39, 40].

314 Participants were initially instructed to learn the common transitions between the initial and  
315 the final states in the absence of reward. Participants then performed the task defined by the model  
316 above in the simultaneous or sequential condition. Half of the participants were randomly allocated  
317 to the simultaneous condition and the other half to the sequential condition (Figure 1). In the  
318 simultaneous condition, both symbols that define the initial state were displayed simultaneously  
319 on the screen for 3 seconds. In the sequential condition, each symbol is an element of a sequence  
320 and each element was presented for 1 second, but never conjointly, and with a 1-second delay  
321 (blank screen) in between. Two triangles pointing left and right then appeared and the participant  
322 was given 2 seconds to make a decision about whether to press the left or the right arrow keys;  
323 if they did not press any keys, the word SLOW was displayed for 1 second, and the trial was

324 aborted and omitted from analysis. A blue or pink rectangle appeared immediately afterward,  
325 indicating the final state. The participant then pressed the up-arrow key and, if the final state was  
326 rewarded, a green dollar sign appeared on the screen for 2 seconds; otherwise, a black X appeared  
327 for 2 seconds. The task comprised 250 trials, with a break every 50 trials, and participants received  
328 the total reward they obtained by the end of the task (0.18 CHF per reward).

### 329 4.3 Model-free algorithm

330 The SARSA model-free algorithm with replacing eligibility traces [1, 17] was used to simulate  
331 model-free learning agents. For each action  $a$  and state  $s$ , it estimated the value  $Q(s, a)$  of per-  
332 forming that action in that state. The task's initial states  $s_i$  were AA, AB, BA, and BB, and  
333 the actions  $a_i$  available at the initial states were *left* and *right*. The final states were *pink* and  
334 *blue*, and the only action  $a_f$  available at those states was *up*. The initial value of  $Q(s, a)$  for every  
335 state and action was 0.5. In each trial  $t$ , the simulated agent at the initial state  $s_i$  chose *left* as  
336 its initial-state action with probability  $p_{left}$  and *right* with probability  $1 - p_{left}$ , according to the  
337 following equation:

$$p_{left} = \frac{1}{1 + e^{-\beta[Q(s_i, left) - Q(s_i, right)]}}, \quad (1)$$

338 where  $\beta > 0$  is an inverse temperature parameter that determines the algorithm's propensity to  
339 choose the option with the highest estimated value. After the final state  $s_f$  was observed and  
340 a reward  $r \in \{0, 1\}$  was received, state-action values were updated according to the following  
341 equations:

$$Q(s_i, a_i) = (1 - \alpha_1)Q(s_i, a_i) + \alpha_1 Q(s_f, up) + \alpha_1 \lambda [r - Q(s_f, up)], \quad (2)$$

$$Q(s_f, up) = (1 - \alpha_2)Q(s_f, up) + \alpha_2 r, \quad (3)$$

342 where  $0 \leq \alpha_1, \alpha_2, \lambda \leq 1$  are parameters:  $\alpha_1$  is the initial learning rate,  $\alpha_2$  is the final learning rate,  
343 and  $\lambda$  is the eligibility trace [1, 17].

344 In the special case where  $\lambda = 1$ , the update of initial state-action values becomes

$$Q(s_i, a_i) = (1 - \alpha_1)Q(s_i, a_i) + \alpha_1 r, \quad (4)$$

345 that is, the estimated values of choosing *left* and *right* in each initial state are updated indepen-  
346 dently of the final state's estimated value. Thus, SARSA ( $\lambda = 1$ ) ignores the identity of the final  
347 state when making initial-state decisions, and an initial-state action that resulted in a reward will  
348 necessarily lead to a higher stay probability when the respective initial state recurs. This is true

349 even if the action will probably lead to the final state with the lowest value.

#### 350 4.4 Model-based algorithm

351 In simulations of model-based agents [17], values were assigned to initial-state actions and to final  
352 states. The value  $V$  of a final state  $s \in \{pink, blue\}$  in the first trial  $t = 1$  was  $V(s, 1) = 0.5$ . An  
353 initial-state choice  $c \in \{left, right\}$  in trial  $t$  had a value  $V$  given by

$$V(c, t) = \Pr(c \rightarrow pink)V(pink, t) + \Pr(c \rightarrow blue)V(blue, t), \quad (5)$$

354 where  $\Pr(c \rightarrow s)$  is the probability that choosing  $c$  will lead to the final state  $s$ , which might be  
355 0.8 or 0.2 according to the task's transition model. The value of an initial-state choice can thus be  
356 understood as the expected value of the final state the agent will go to after making that choice.  
357 If  $V(left, t) > V(right, t)$ , the agent was more likely to choose left and vice-versa.

358 In each trial  $t$ , the agent's initial state action was *left* with probability  $p_{left}$  and *right* with  
359 probability  $1 - p_{left}$ , given by

$$p_{left} = \frac{1}{1 + e^{-\beta[V(left, t) - V(right, t)]}}, \quad (6)$$

360 where  $\beta$  is an inverse temperature parameter. After the agent made its initial-state choice and  
361 went to a final state  $s$ , that final state's value was updated according to the following equation:

$$V(s, t + 1) = (1 - \alpha)V(s, t) + \alpha r(t), \quad (7)$$

362 where  $r(t) \in \{0, 1\}$  indicates if the agent received a reward and  $0 \leq \alpha \leq 1$  is a learning-rate  
363 parameter of the model. The value of a final state is thus the moving average of the rewards  
364 received in that state.

#### 365 4.5 Data analysis by logistic regression

366 For each human participant or simulated agent, we calculated the stay probability in pairs of  
367 consecutive trials as a function of reward, transition, initial-state choice and visited final state in  
368 the first trial [34]. In the second trial of each pair, if the human participant or simulated agent  
369 chose an action (left or right) that was the same as that chosen in the previous trial, this was  
370 considered a stay. For each trial pair, the second trial's choice was coded as the random variable  $y$   
371 and classified as a stay ( $y = 1$ ) or not a stay ( $y = 0$ ). For each condition, trial pairs were divided

372 into four subsets: “same letters” (if the letters presented in the first trial were the same as the  
373 letters presented in the second trial; for example, AB for the first trial, AB for the second), “same  
374 first letter” (if the first letter presented in the first trial was the same as the first letter presented  
375 in the second trial, but the second letter was different; for example, AB for the first trial, AA for  
376 the second), “same second letter” (if the second letter presented in the first trial was the same as  
377 the second letter presented in the second trial, but the first letter was different; for example, AB  
378 for the first trial, BB for the second), and “different letters” (if both letters presented in the first  
379 trial were different from the letters presented in the second trial; for example, AB for the first trial,  
380 BA for the second). For each trial pair subset, a separate analysis was performed.

381 We then analyzed the resulting data using a hierarchical logistic regression model whose pa-  
382 rameters were estimated through Bayesian computational methods. The dependent variable was  
383  $p_{\text{stay}}$ , the stay probability for a given trial, and the independent variables were  $x_r$ , which indicated  
384 whether a reward was received or not in the previous trial (+1 if the previous trial was rewarded,  
385 -1 otherwise),  $x_t$ , which indicated whether the transition in the previous trial was common or  
386 rare (+1 if it was common, -1 if it was rare), the interaction between the two,  $x_c$ , which indicated  
387 whether in the previous trial the participant chose or not the initial-state choice with the highest  
388 reward probability (+1 if the choice had the highest reward probability, -1 otherwise), and  $x_f$ ,  
389 which indicated whether in the pervious trial the participant visited the final state with the highest  
390 reward probability (+1 if the final state had the highest reward probability, -1 otherwise). Thus,  
391 for each condition, we determined a intercept  $\beta_0^p$  for each participant and five fixed coefficients  
392 that are shown in the following equation:

$$p_{\text{stay}} = \frac{1}{1 + \exp[-(\beta_0^p + \beta_r x_r + \beta_t x_t + \beta_{r \times t} x_r x_t + \beta_c x_c + \beta_f x_f)]}. \quad (8)$$

393 The distribution of  $y$  was Bernoulli( $p_{\text{stay}}$ ). The distribution of the  $\vec{\beta}$  vectors was  $\mathcal{N}(\vec{\mu}_c, \vec{\sigma}^2)$  if the  
394 participant was in the simultaneous condition and  $\mathcal{N}(\vec{\mu}_e, \vec{\sigma}^2)$  if the participant was in the sequen-  
395 tial condition; in other words, the subset means for each  $\vec{\beta}$  were allowed to vary independently.  
396 The parameters of the  $\vec{\beta}$  distribution were given vague prior distributions based on preliminary  
397 analyses—the  $\vec{\mu}$  vectors’ components were given a  $\mathcal{N}(\mu = 0, \sigma^2 = 25)$  prior, and the  $\vec{\sigma}^2$  vector’s  
398 components were given a Half-normal(0, 25) prior. Other vague prior distributions for the model  
399 parameters were tested and the results did not change significantly.

400 To obtain parameter estimates from the model’s posterior distribution, we coded the model into  
401 the Stan modeling language [41, 42] and used the PyStan Python package [43] to obtain 80,000  
402 samples of the joint posterior distribution from four chains of length 40,000 (warmup 20,000).

403 Convergence of the chains was indicated by  $\hat{R} \approx 1.0$  for all parameters.

## 404 4.6 Fitting of the algorithms to experimental data

405 For comparison with the participant data, we fitted the SARSA model-free algorithm and the  
406 model-based algorithm to the experimental data and generated replicated data using the fitted  
407 parameters. The parameters were obtained by fitting both algorithms to all participants. To that  
408 end, we used a Bayesian hierarchical model, which allowed us to pool data from all participants to  
409 improve individual parameter estimates.

410 The parameters of the model-based algorithm for the  $i$ th participant were  $\alpha^i$  and  $\beta^i$ . They  
411 were given a  $\text{Beta}(a_\alpha, b_\alpha)$  and  $\ln \mathcal{N}(\mu_\beta, \sigma_\beta^2)$  prior distributions respectively. The hyperparameters  
412  $a_\alpha$  and  $b_\alpha$  were themselves given a noninformative  $\text{Half-normal}(0, 10^4)$  prior and the hyperparam-  
413 eters  $\mu_\beta$  and  $\sigma_\beta^2$  were given a noninformative  $\mathcal{N}(0, 10^4)$  and  $\text{Half-normal}(0, 10^4)$  priors respectively.  
414 The parameters of the model-free algorithm for the  $i$ th participant were  $\alpha_1^i$ ,  $\alpha_2^i$ ,  $\lambda^i$ , and  $\beta^i$ . They  
415 were given a  $\text{Beta}(a_{\alpha_1}, b_{\alpha_1})$ ,  $\text{Beta}(a_{\alpha_2}, b_{\alpha_2})$ ,  $\text{Beta}(a_\lambda, b_\lambda)$  and  $\ln \mathcal{N}(\mu_\beta, \sigma_\beta^2)$  prior distributions re-  
416 spectively. The hyperparameters  $a_{\alpha_1}$ ,  $a_{\alpha_2}$ ,  $a_\lambda$ ,  $b_{\alpha_1}$ ,  $b_{\alpha_2}$ , and  $b_\lambda$  were themselves given a noninfor-  
417 mative  $\text{Half-normal}(0, 10^4)$  prior and the hyperparameters  $\mu_\beta$  and  $\sigma_\beta^2$  were given a noninformative  
418  $\mathcal{N}(0, 10^4)$  and  $\text{Half-normal}(0, 10^4)$  priors respectively. We then coded the models into the Stan  
419 modeling language [41, 42] and used the PyStan Python package [43] to obtain 40,000 samples of  
420 the joint posterior distribution from one chain of length 80,000 (warmup 40,000). Convergence of  
421 the chains was indicated by  $\hat{R} \approx 1.0$  for all parameters.

## 422 4.7 Code and data availability

423 All the behavioral data used in this study are available at [https://github.com/carolfs/mf\\_wm](https://github.com/carolfs/mf_wm)

## 424 References

- 425 [1] Richard S. Sutton and Andrew G. Barto. *Reinforcement Learning: An Introduction*. A  
426 Bradford Book, first edition, 1998.
- 427 [2] W. Schultz, P. Dayan, and P. R. Montague. A Neural Substrate of Prediction and Reward.  
428 *Science*, 275(5306):1593–1599, mar 1997. ISSN 0036-8075. doi: 10.1126/science.275.5306.1593.  
429 URL <http://www.sciencemag.org/cgi/doi/10.1126/science.275.5306.1593>.
- 430 [3] Christopher D Fiorillo, Philippe N Tobler, and Wolfram Schultz. Discrete coding of reward  
431 probability and uncertainty by dopamine neurons. *Science (New York, N. Y.)*, 299(5614):1898–

- 432 902, mar 2003. ISSN 1095-9203. doi: 10.1126/science.1077349. URL <http://www.ncbi.nlm.nih.gov/pubmed/12649484>.
- 433
- 434 [4] Yael Niv. Reinforcement learning in the brain. *Journal of Mathematical Psychology*, 53(3):139–  
435 154, jun 2009. ISSN 00222496. doi: 10.1016/j.jmp.2008.12.005. URL <http://linkinghub.elsevier.com/retrieve/pii/S0022249608001181>.
- 436
- 437 [5] Paul W. Glimcher. Understanding dopamine and reinforcement learning: The dopamine  
438 reward prediction error hypothesis. *Proceedings of the National Academy of Sciences*, 108  
439 (Supplement\_3):15647–15654, sep 2011. ISSN 0027-8424. doi: 10.1073/pnas.1014269108.  
440 URL <http://www.pnas.org/cgi/doi/10.1073/pnas.1014269108>.
- 441 [6] Daeyeol Lee, Hyojung Seo, and Min Whan Jung. Neural Basis of Reinforcement Learning  
442 and Decision Making. *Annual Review of Neuroscience*, 35(1):287–308, jul 2012. ISSN 0147-  
443 006X. doi: 10.1146/annurev-neuro-062111-150512. URL [http://www.annualreviews.org/  
444 doi/abs/10.1146/annurev-neuro-062111-150512](http://www.annualreviews.org/doi/abs/10.1146/annurev-neuro-062111-150512).
- 445 [7] Ray J. Dolan and Peter Dayan. Goals and Habits in the Brain. *Neuron*, 80(2):312–325,  
446 oct 2013. ISSN 08966273. doi: 10.1016/j.neuron.2013.09.007. URL <http://linkinghub.elsevier.com/retrieve/pii/S0896627313008052>.
- 447
- 448 [8] Ann M. Graybiel. Habits, Rituals, and the Evaluative Brain. *Annual Review of Neuroscience*,  
449 31(1):359–387, jul 2008. ISSN 0147-006X. doi: 10.1146/annurev.neuro.29.051605.112851. URL  
450 <http://www.annualreviews.org/doi/10.1146/annurev.neuro.29.051605.112851>.
- 451 [9] Peter Dayan. How to set the switches on this thing. *Current Opinion in Neurobiology*,  
452 22(6):1068–1074, dec 2012. ISSN 09594388. doi: 10.1016/j.conb.2012.05.011. URL <http://linkinghub.elsevier.com/retrieve/pii/S0959438812000992>.
- 453
- 454 [10] Kyle S. Smith and Ann M. Graybiel. Investigating habits: strategies, technologies and mod-  
455 els. *Frontiers in Behavioral Neuroscience*, 8, 2014. ISSN 1662-5153. doi: 10.3389/fnbeh.2014.  
456 00039. URL [http://journal.frontiersin.org/article/10.3389/fnbeh.2014.00039/  
457 abstract](http://journal.frontiersin.org/article/10.3389/fnbeh.2014.00039/abstract).
- 458 [11] Fiery Cushman and Adam Morris. Habitual control of goal selection in humans. *Pro-  
459 ceedings of the National Academy of Sciences*, 112(45):13817–13822, nov 2015. ISSN 0027-  
460 8424. doi: 10.1073/pnas.1506367112. URL [http://www.pnas.org/lookup/doi/10.1073/  
461 pnas.1506367112](http://www.pnas.org/lookup/doi/10.1073/pnas.1506367112).

- 462 [12] Henk Aarts and Ap Dijksterhuis. Habits as knowledge structures: Automaticity in goal-  
463 directed behavior. *Journal of Personality and Social Psychology*, 78(1):53–63, 2000. ISSN  
464 1939-1315. doi: 10.1037/0022-3514.78.1.53. URL [http://doi.apa.org/getdoi.cfm?doi=](http://doi.apa.org/getdoi.cfm?doi=10.1037/0022-3514.78.1.53)  
465 [10.1037/0022-3514.78.1.53](http://doi.apa.org/getdoi.cfm?doi=10.1037/0022-3514.78.1.53).
- 466 [13] Amir Dezfouli and Bernard W. Balleine. Habits, action sequences and reinforcement learning.  
467 *European Journal of Neuroscience*, 35(7):1036–1051, apr 2012. ISSN 0953816X. doi: 10.  
468 1111/j.1460-9568.2012.08050.x. URL [http://doi.wiley.com/10.1111/j.1460-9568.2012.](http://doi.wiley.com/10.1111/j.1460-9568.2012.08050.x)  
469 [08050.x](http://doi.wiley.com/10.1111/j.1460-9568.2012.08050.x).
- 470 [14] Amir Dezfouli and Bernard W. Balleine. Actions, Action Sequences and Habits: Evidence That  
471 Goal-Directed and Habitual Action Control Are Hierarchically Organized. *PLoS Computa-*  
472 *tional Biology*, 9(12):e1003364, dec 2013. ISSN 1553-7358. doi: 10.1371/journal.pcbi.1003364.  
473 URL <http://dx.plos.org/10.1371/journal.pcbi.1003364>.
- 474 [15] A. Dezfouli, N. W. Lingawi, and B. W. Balleine. Habits as action sequences: hierarchical  
475 action control and changes in outcome value. *Philosophical Transactions of the Royal Society*  
476 *B: Biological Sciences*, 369(1655):20130482–20130482, sep 2014. ISSN 0962-8436. doi: 10.  
477 1098/rstb.2013.0482. URL [http://rstb.royalsocietypublishing.org/cgi/doi/10.1098/](http://rstb.royalsocietypublishing.org/cgi/doi/10.1098/rstb.2013.0482)  
478 [rstb.2013.0482](http://rstb.royalsocietypublishing.org/cgi/doi/10.1098/rstb.2013.0482).
- 479 [16] Randall C. O’Reilly and Michael J. Frank. Making Working Memory Work: A Computational  
480 Model of Learning in the Prefrontal Cortex and Basal Ganglia. *Neural Computation*, 18  
481 (2):283–328, feb 2006. ISSN 0899-7667. doi: 10.1162/089976606775093909. URL [http:](http://www.mitpressjournals.org/doi/abs/10.1162/089976606775093909)  
482 [//www.mitpressjournals.org/doi/abs/10.1162/089976606775093909](http://www.mitpressjournals.org/doi/abs/10.1162/089976606775093909).
- 483 [17] Nathaniel D. Daw, Samuel J. Gershman, Ben Seymour, Peter Dayan, and Raymond J. Dolan.  
484 Model-Based Influences on Humans’ Choices and Striatal Prediction Errors. *Neuron*, 69(6):  
485 1204–1215, mar 2011. ISSN 08966273. doi: 10.1016/j.neuron.2011.02.027. URL [http://](http://linkinghub.elsevier.com/retrieve/pii/S0896627311001255)  
486 [linkinghub.elsevier.com/retrieve/pii/S0896627311001255](http://linkinghub.elsevier.com/retrieve/pii/S0896627311001255).
- 487 [18] Michael T Todd, Yael Niv, and Jonathan D Cohen. Learning to Use Working Memory in Par-  
488 tially Observable Environments through Dopaminergic Reinforcement. In D Koller, D Schuur-  
489 mans, Y Bengio, and L Bottou, editors, *Advances in Neural Information Processing Systems*  
490 *21*, pages 1689–1696. Curran Associates, Inc., 2009. URL [http://papers.nips.cc/paper/](http://papers.nips.cc/paper/3508-learning-to-use-working-memory-in-partially-observable-environments-through-dopaminergic)  
491 [3508-learning-to-use-working-memory-in-partially-observable-environments-through-dopaminergic](http://papers.nips.cc/paper/3508-learning-to-use-working-memory-in-partially-observable-environments-through-dopaminergic)  
492 [pdf](http://papers.nips.cc/paper/3508-learning-to-use-working-memory-in-partially-observable-environments-through-dopaminergic).

- 493 [19] Arthur S. Reber. Implicit learning and tacit knowledge. *Journal of Experimental Psychology:*  
494 *General*, 118(3):219–235, 1989. ISSN 1939-2222. doi: 10.1037/0096-3445.118.3.219. URL  
495 <http://doi.apa.org/getdoi.cfm?doi=10.1037/0096-3445.118.3.219>.
- 496 [20] Richard L. Canfield and Marshall M. Haith. Young infants’ visual expectations for symmetric  
497 and asymmetric stimulus sequences. *Developmental Psychology*, 27(2):198–208, 1991. ISSN  
498 0012-1649. doi: 10.1037/0012-1649.27.2.198. URL [http://doi.apa.org/getdoi.cfm?doi=](http://doi.apa.org/getdoi.cfm?doi=10.1037/0012-1649.27.2.198)  
499 [10.1037/0012-1649.27.2.198](http://doi.apa.org/getdoi.cfm?doi=10.1037/0012-1649.27.2.198).
- 500 [21] Scott A. Huettel, Peter B. Mack, and Gregory McCarthy. Perceiving patterns in random series:  
501 dynamic processing of sequence in prefrontal cortex. *Nature Neuroscience*, apr 2002. ISSN  
502 10976256. doi: 10.1038/nn841. URL <http://www.nature.com/doi/10.1038/nn841>.
- 503 [22] Asher Cohen, Richard I. Ivry, and Steven W. Keele. Attention and structure in sequence  
504 learning. *Journal of Experimental Psychology: Learning, Memory, and Cognition*, 16(1):17–  
505 30, 1990. ISSN 1939-1285. doi: 10.1037/0278-7393.16.1.17. URL [http://doi.apa.org/](http://doi.apa.org/getdoi.cfm?doi=10.1037/0278-7393.16.1.17)  
506 [getdoi.cfm?doi=10.1037/0278-7393.16.1.17](http://doi.apa.org/getdoi.cfm?doi=10.1037/0278-7393.16.1.17).
- 507 [23] Axel Cleeremans and James L. McClelland. Learning the structure of event sequences.  
508 *Journal of Experimental Psychology: General*, 120(3):235–253, 1991. ISSN 1939-2222.  
509 doi: 10.1037/0096-3445.120.3.235. URL [http://doi.apa.org/getdoi.cfm?doi=10.1037/](http://doi.apa.org/getdoi.cfm?doi=10.1037/0096-3445.120.3.235)  
510 [0096-3445.120.3.235](http://doi.apa.org/getdoi.cfm?doi=10.1037/0096-3445.120.3.235).
- 511 [24] I H Jenkins, D J Brooks, P D Nixon, R S Frackowiak, and R E Passingham. Motor sequence  
512 learning: a study with positron emission tomography. *The Journal of neuroscience : the*  
513 *official journal of the Society for Neuroscience*, 14(6):3775–90, jun 1994. ISSN 0270-6474.  
514 URL <http://www.ncbi.nlm.nih.gov/pubmed/8207487>.
- 515 [25] Eli Vakil, Shimon Kahan, Moshe Huberman, and Alicia Osimani. Motor and non-motor  
516 sequence learning in patients with basal ganglia lesions: The case of serial reaction time (SRT).  
517 *Neuropsychologia*, 38(1):1–10, 2000. ISSN 00283932. doi: 10.1016/S0028-3932(99)00058-5.
- 518 [26] S. Lehericy, H. Benali, P.-F. Van de Moortele, M. Pelegriani-Issac, T. Waechter, K. Ugurbil,  
519 and J. Doyon. Distinct basal ganglia territories are engaged in early and advanced motor  
520 sequence learning. *Proceedings of the National Academy of Sciences*, 102(35):12566–12571,  
521 aug 2005. ISSN 0027-8424. doi: 10.1073/pnas.0502762102. URL [http://www.pnas.org/](http://www.pnas.org/cgi/doi/10.1073/pnas.0502762102)  
522 [cgi/doi/10.1073/pnas.0502762102](http://www.pnas.org/cgi/doi/10.1073/pnas.0502762102).

- 523 [27] A. R. Otto, C. M. Raio, A. Chiang, E. A. Phelps, and N. D. Daw. Working-memory capacity  
524 protects model-based learning from stress. *Proceedings of the National Academy of Sciences*,  
525 110(52):20941–20946, dec 2013. ISSN 0027-8424. doi: 10.1073/pnas.1312011110. URL <http://www.pnas.org/cgi/doi/10.1073/pnas.1312011110>.  
526
- 527 [28] A. Ross Otto, Samuel J. Gershman, Arthur B. Markman, and Nathaniel D. Daw. The Curse  
528 of Planning. *Psychological Science*, 24(5):751–761, may 2013. ISSN 0956-7976. doi: 10.1177/  
529 0956797612463080. URL <http://journals.sagepub.com/doi/10.1177/0956797612463080>.
- 530 [29] A. Ross Otto, Anya Skatova, Seth Madlon-Kay, and Nathaniel D. Daw. Cog-  
531 nitive Control Predicts Use of Model-based Reinforcement Learning. *Journal*  
532 *of Cognitive Neuroscience*, 27(2):319–333, feb 2015. ISSN 0898-929X. doi:  
533 10.1162/jocn\_a\_00709. URL [http://www.mitpressjournals.org/doi/abs/10.1162/  
534 jocn\\_a\\_00709](http://www.mitpressjournals.org/doi/abs/10.1162/jocn_a_00709)[http://www.mitpressjournals.org/doi/10.1162/jocn\\_a\\_00709](http://www.mitpressjournals.org/doi/10.1162/jocn_a_00709).
- 535 [30] J. H. Decker, A. R. Otto, N. D. Daw, and C. A. Hartley. From Creatures of Habit  
536 to Goal-Directed Learners: Tracking the Developmental Emergence of Model-Based Re-  
537 inforcement Learning. *Psychological Science*, 27(6):848–858, jun 2016. ISSN 0956-7976.  
538 doi: 10.1177/0956797616639301. URL [http://pss.sagepub.com/lookup/doi/10.1177/  
539 0956797616639301](http://pss.sagepub.com/lookup/doi/10.1177/0956797616639301).
- 540 [31] Peter Smittenaar, Thomas H.B. FitzGerald, Vincenzo Romei, Nicholas D. Wright, and Ray-  
541 mond J. Dolan. Disruption of Dorsolateral Prefrontal Cortex Decreases Model-Based in Fa-  
542 vor of Model-free Control in Humans. *Neuron*, 80(4):914–919, nov 2013. ISSN 08966273.  
543 doi: 10.1016/j.neuron.2013.08.009. URL [http://linkinghub.elsevier.com/retrieve/  
544 pii/S0896627313007204](http://linkinghub.elsevier.com/retrieve/pii/S0896627313007204).
- 545 [32] Thomas Akam, Rui Costa, and Peter Dayan. Simple Plans or Sophisticated Habits? State,  
546 Transition and Learning Interactions in the Two-Step Task. *PLOS Computational Biology*,  
547 11(12):e1004648, dec 2015. ISSN 1553-7358. doi: 10.1371/journal.pcbi.1004648. URL <http://dx.plos.org/10.1371/journal.pcbi.1004648>.  
548
- 549 [33] Kevin J Miller, Carlos D Brody, and Matthew M Botvinick. Identifying Model-Based and  
550 Model-Free Patterns in Behavior on Multi-Step Tasks. *bioRxiv*, page 14, 2016. doi: 10.1101/  
551 096339. URL <https://doi.org/10.1101/096339>.
- 552 [34] Carolina Feher da Silva and Todd A. Hare. A note on the analysis of two-stage task results:  
553 How changes in task structure affect what model-free and model-based strategies predict about

554 the effects of reward and transition on the stay probability. *PLOS ONE*, 13(4):e0195328, apr  
555 2018. ISSN 1932-6203. doi: 10.1371/journal.pone.0195328. URL [http://dx.plos.org/10.  
556 1371/journal.pone.0195328](http://dx.plos.org/10.1371/journal.pone.0195328).

557 [35] Bradley B Doll, Katherine D Duncan, Dylan A Simon, Daphna Shohamy, and Nathaniel D  
558 Daw. Model-based choices involve prospective neural activity. *Nature Neuroscience*, 18(5):  
559 767–772, mar 2015. ISSN 1097-6256. doi: 10.1038/nn.3981. URL [http://www.nature.com/  
560 doifinder/10.1038/nn.3981](http://www.nature.com/doi/10.1038/nn.3981).

561 [36] Wouter Kool, Fiery A. Cushman, and Samuel J. Gershman. When Does Model-Based Control  
562 Pay Off? *PLOS Computational Biology*, 12(8):e1005090, aug 2016. ISSN 1553-7358. doi:  
563 10.1371/journal.pcbi.1005090. URL <http://dx.plos.org/10.1371/journal.pcbi.1005090>.

564 [37] G. Cumming. Precision for Planning. In *Understanding The New Statistics*, chapter 13, pages  
565 355–380. Routledge, New York, London, 1 edition, 2012.

566 [38] J. K. Kruschke. Goals, Power, and Sample Size. In *Doing Bayesian Data Analysis*, chapter 13,  
567 pages 359–398. Academic Press, London, 2 edition, 2015.

568 [39] Nathaniel D Daw, Yael Niv, and Peter Dayan. Uncertainty-based competition between pre-  
569 frontal and dorsolateral striatal systems for behavioral control. *Nature neuroscience*, 8(12):  
570 1704–11, dec 2005. ISSN 1097-6256. doi: 10.1038/nn1560. URL [http://dx.doi.org/10.  
571 1038/nn1560](http://dx.doi.org/10.1038/nn1560)<http://www.ncbi.nlm.nih.gov/pubmed/16286932>.

572 [40] Nathaniel D. Daw and John P. O’Doherty. Multiple Systems for Value Learning. In  
573 Paul W. Glimcher and Ernst Fehr, editors, *Neuroeconomics*, chapter 21, pages 393–410.  
574 Elsevier, second edition, 2014. doi: 10.1016/B978-0-12-416008-8.00021-8. URL [http:  
575 //linkinghub.elsevier.com/retrieve/pii/B9780124160088000218](http://linkinghub.elsevier.com/retrieve/pii/B9780124160088000218).

576 [41] Bob Carpenter, Andrew Gelman, Matthew D. Hoffman, Daniel Lee, Ben Goodrich, Michael  
577 Betancourt, Marcus Brubaker, Jiqiang Guo, Peter Li, and Allen Riddell. Stan : A Probabilistic  
578 Programming Language. *Journal of Statistical Software*, 76(1), 2017. ISSN 1548-7660. doi:  
579 10.18637/jss.v076.i01. URL <http://www.jstatsoft.org/v76/i01/>.

580 [42] Stan Development Team. Stan Modeling Language Users Guide and Reference Manual, Ver-  
581 sion 2.16.0, 2017.

582 [43] Stan Development Team. PyStan: the Python interface to Stan, 2017. URL [http://mc-stan.  
583 org](http://mc-stan.org).

## 584 Appendix



Figure 11: Timeline of a replication of the current study using figures to identify the initial states rather than letters. The two final states were the blue state and the yellow state.



Figure 12: In our replication task, participants saw two figures on the screen, an upper figure and a lower figure (A). They were instructed to imagine how the two figures would fit together in other to determine the common and rare transitions (B). If, for instance, the participant saw one of the upper pair of figures shown in panel B, pressing left would commonly take them to the blue final state and pressing right would commonly take them to the yellow final state. If instead they saw one of the lower pair of figures in panel B, pressing right would commonly take them to yellow state and vice versa.



Figure 13: Logistic regression coefficients of human participants in our replication experiment for consecutive trial pairs in the “same letters” subset. The error bars correspond to the 95% credible interval.



Figure 14: Logistic regression coefficients of human participants in our replication experiment for consecutive trial pairs in the “same first letter” subset. The error bars correspond to the 95% credible interval.



Figure 15: Logistic regression coefficients of human participants in our replication experiment for consecutive trial pairs in the “same second letter” subset. The error bars correspond to the 95% credible interval.



Figure 16: Logistic regression coefficients of human participants in our replication experiment for consecutive trial pairs in the “different letters” subset. The error bars correspond to the 95% credible interval.
